# Supplementary material for: Direct analysis of urinary 1-hydroxypyrene using extractive electrospray ionization ion trap tandem mass spectrometry
Source: Royal Society of Chemistry journal article supplement (doi:10.1039/c3ay40241j), 2013-01-01
Supplement: c3ay40241j.pdf [file c3ay40241j.pdf]

1

## Supporting Information

2 Direct analysis of urinary 1-hydroxypyrene by using extractive  
3 electrospray ionization ion trap tandem mass spectrometry

4 Xue Li<sup>a,b</sup>, Xiaowei Fang<sup>b</sup>, Zhiqiang Yu<sup>c</sup>, Guoying Sheng<sup>c</sup>, Minghong Wu<sup>d</sup>, Jiamo Fu<sup>a,c</sup>,  
5 Huanwen Chen<sup>\*b</sup>

6 *<sup>a</sup>Institute of Environmental Pollution and Health, School of Environmental and Chemical  
7 Engineering, Shanghai University, Shanghai 200444, PR China*

8 *<sup>b</sup>Jiangxi Key Laboratory for Mass Spectrometry and Instrumentation, Applied Chemistry Department,  
9 East China Institute of Technology, Nanchang 330013, PR China*

10 *<sup>c</sup>Guangdong Key Laboratory of Environmental Protection & Resource Utilization, State Key  
11 Laboratory of Organic Geochemistry, Guangzhou Institute of Geochemistry, Chinese Academy of  
12 Sciences, Guangzhou 510640, PR China*

13 *<sup>d</sup>Shanghai Applied Radiation Institute, School of Environmental and Chemical Engineering, Shanghai  
14 University, Shanghai 200444, PR China*

15 \* To whom correspondence should be addressed.

16 Prof. Dr. Huanwen Chen

17 E-mail: [chw8868@gmail.com](mailto:chw8868@gmail.com).

18 Jiangxi Key Laboratory for Mass Spectrometry and Instrumentation, Applied Chemistry  
19 Department, East China Institute of Technology, Nanchang 330013, PR China

20 Tel: (+86)791-8389-6370. Fax: (+86)791-8389-6370.

21

22

23

24

25 **1. Schematic diagram of the homemade EESI source.**

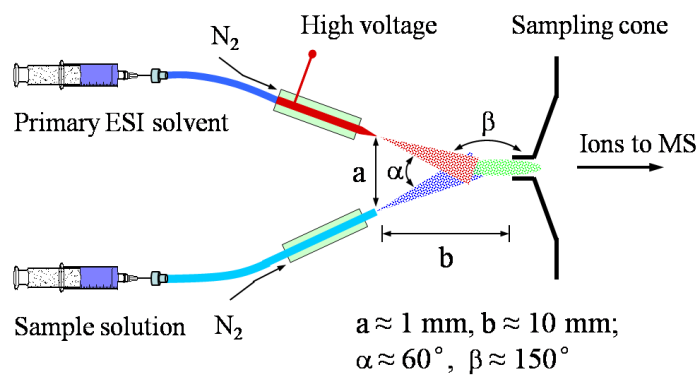

26

27

**Fig. S1** Schematic diagram of the homemade EESI source.

28 **2. EESI-MS fingerprints of the urine sample containing 0.23  $\mu\text{M}$  of 1-OHP.**

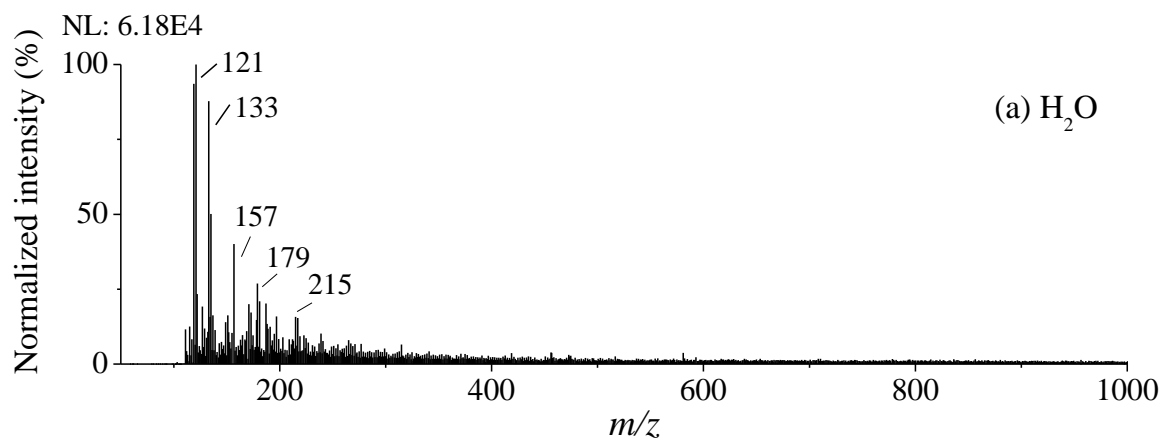

29

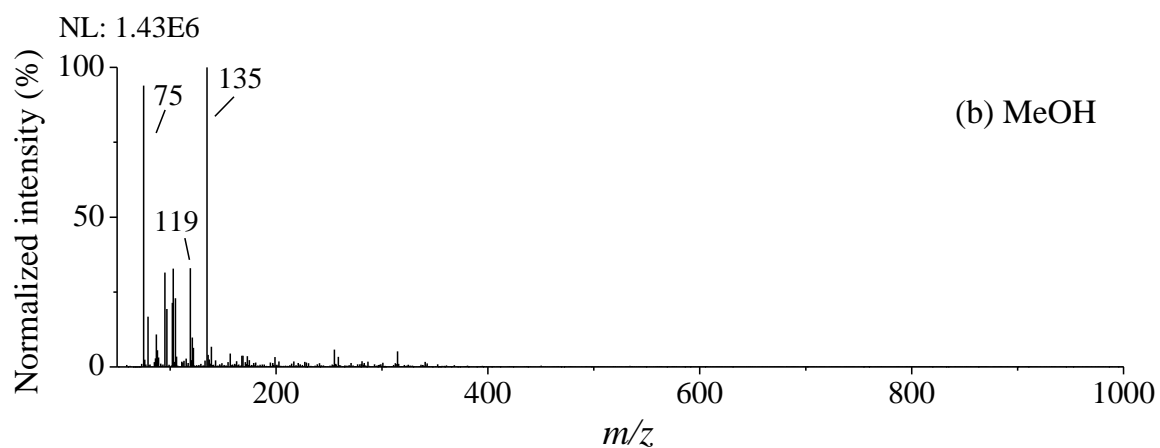

30

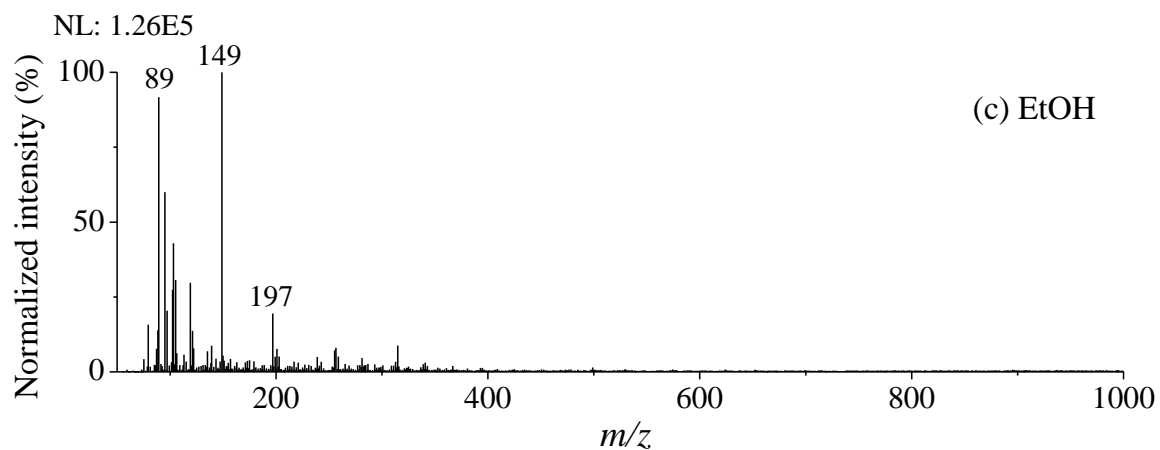

31

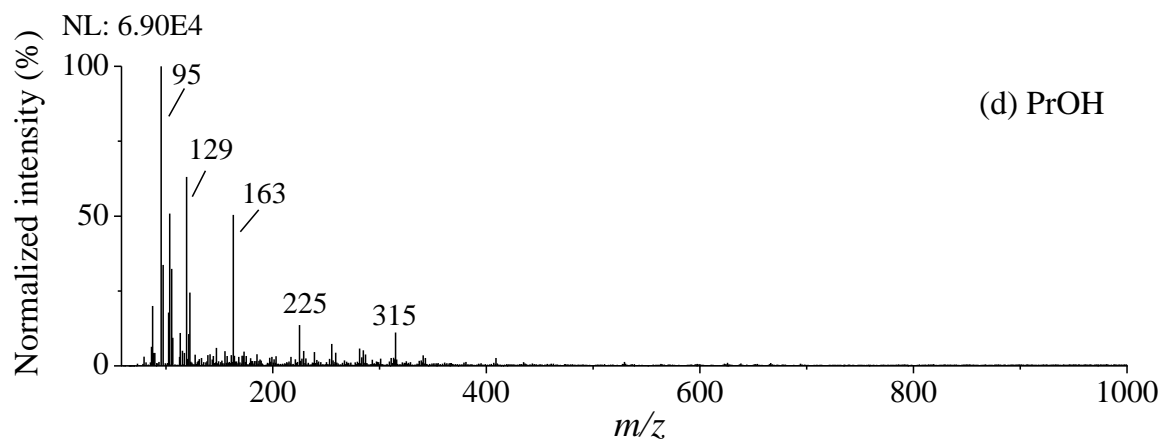

32

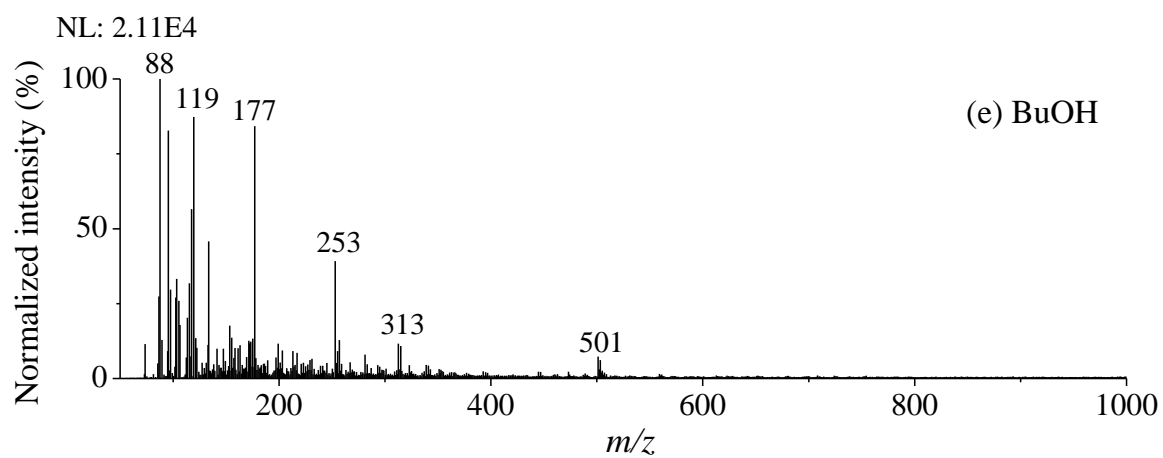

33

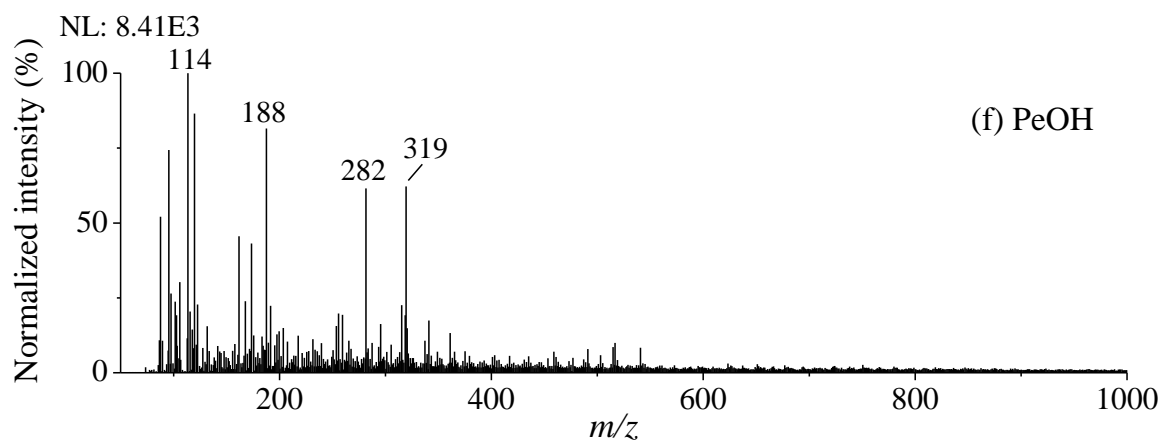

34

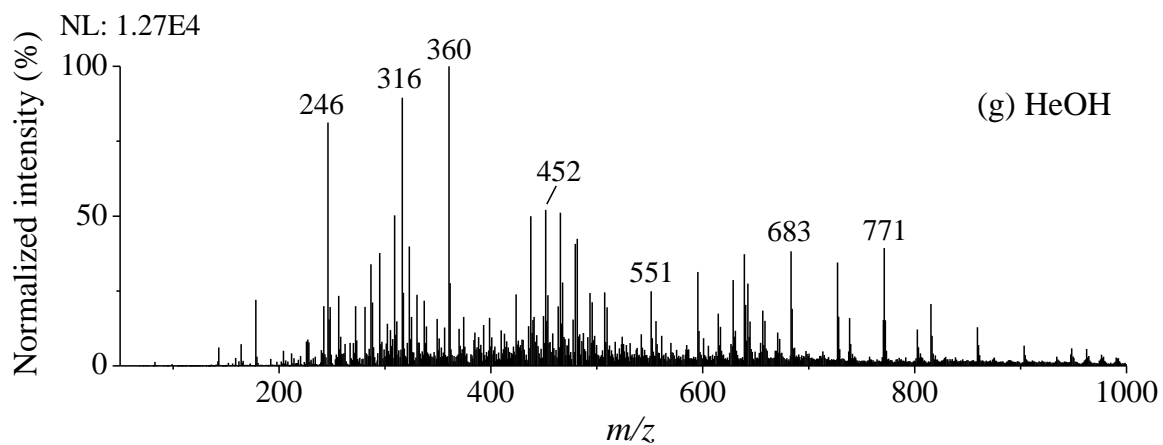

35

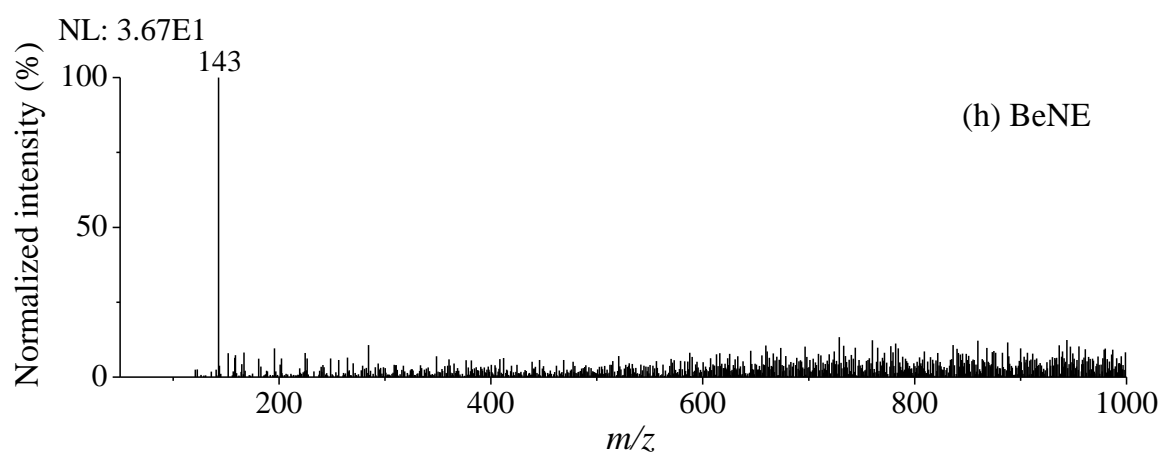

36

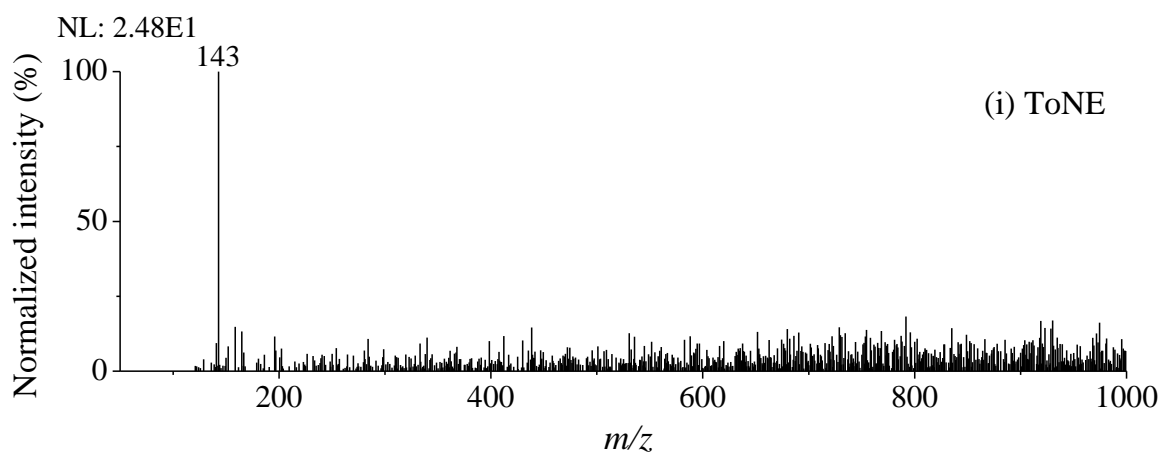

37

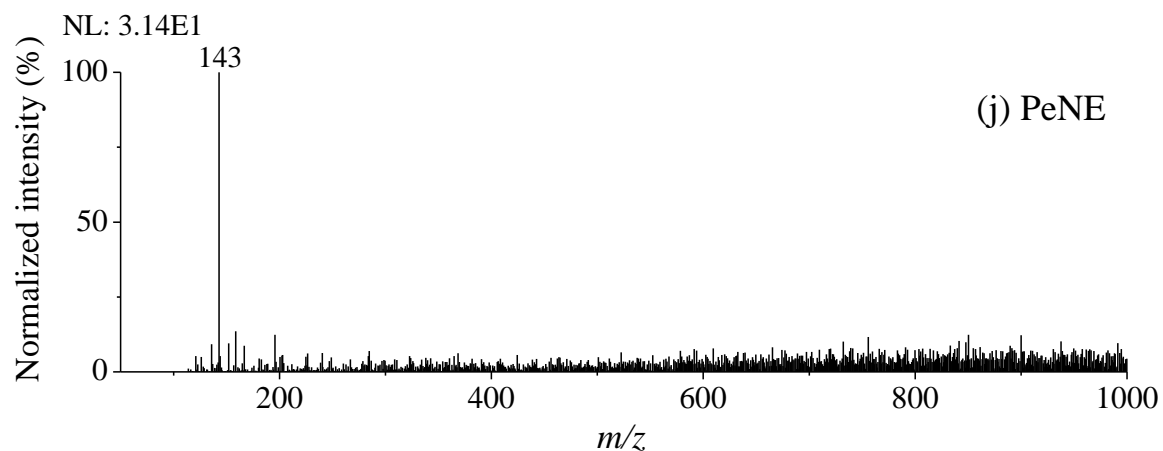

38

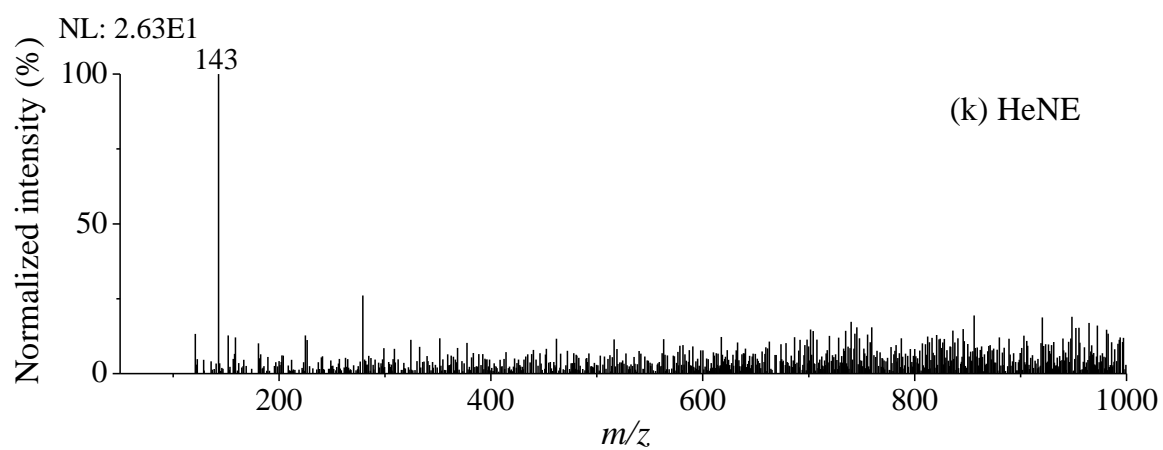

39

40 **Fig. S2** EESI-MS fingerprints of the urine sample spiked with 2.29  $\mu\text{M}$  of 1-OHP when  
41 eleven solvents of different polarities were used as primary ESI solvent, respectively,  
42 including (a) water, (b) MeOH, (c) EtOH, (d) PrOH, (e) BuOH, (f) PeOH, (g) HeOH, (h)  
43 BeNE, (i) ToNE, (j) PeNE and (k) HeNE.

44

45

46 **3. Effect of NH<sub>4</sub>Ac in primary ESI solvent on 1-OHP ionization efficiency.**

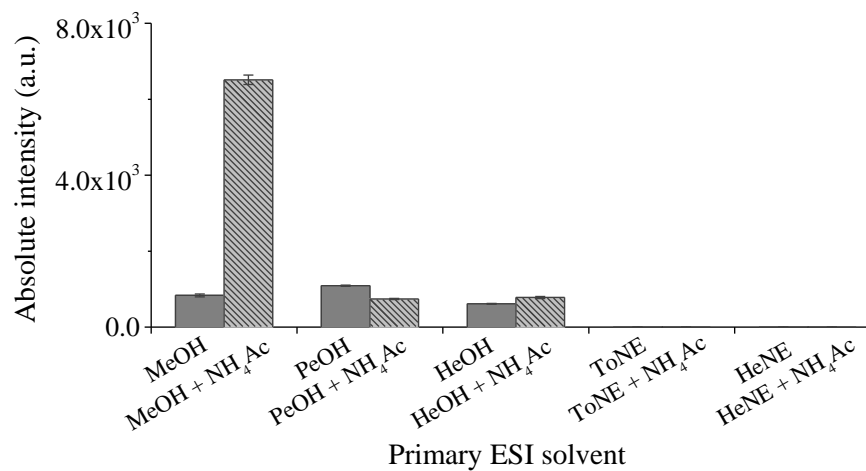

47

48 **Fig. S3** Signal intensities obtained by EESI-MS/MS when five solvents of different  
49 polarities containing  $1.0 \times 10^{-4}$  M of NH<sub>4</sub>Ac were applied as primary ESI solvent,  
50 respectively.

51

52

53

54

55

56

57

58

59

60

61

62

63 **4. Optimization of ESI voltage, primary ESI solvent flow rate, sample flow rate and**  
64 **ion-transport capillary temperature.**

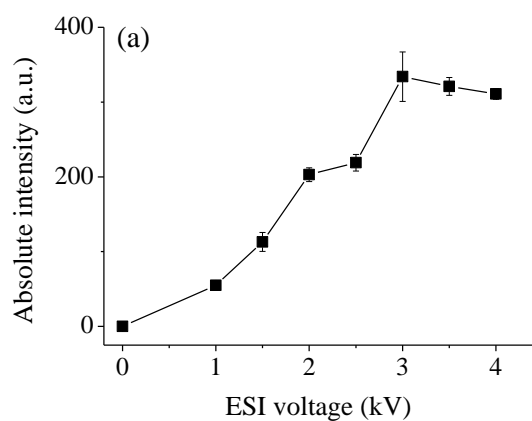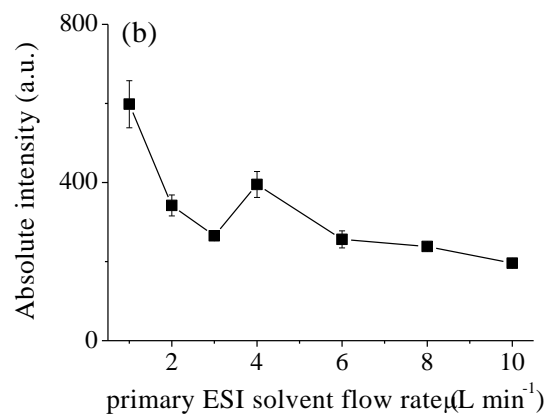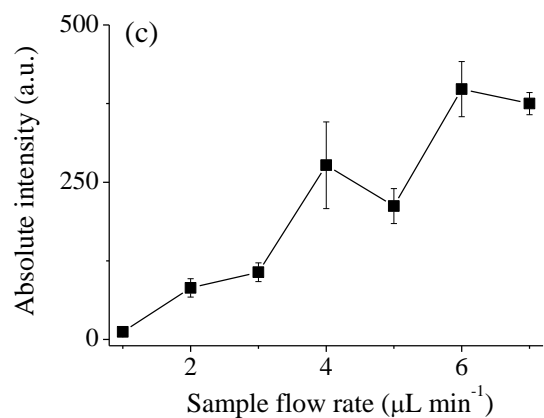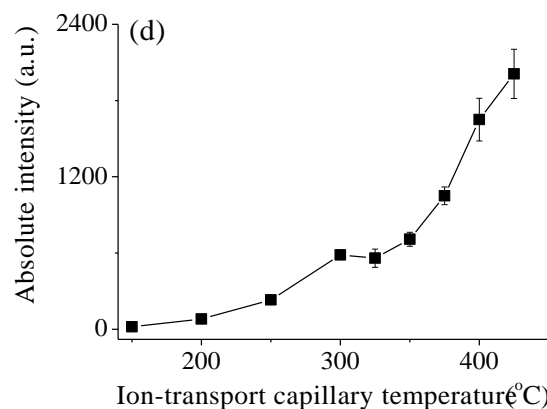

67 **Fig. S4** Signal intensity variation with (a) ESI voltage, (b) primary ESI solvent flow rate, (c)  
68 sample flow rate and (d) ion-transport capillary temperature.

69

70

71

72

73

74

75



76 **5. Signal intensity variation with 1-OHP concentration in ultrapure water.**

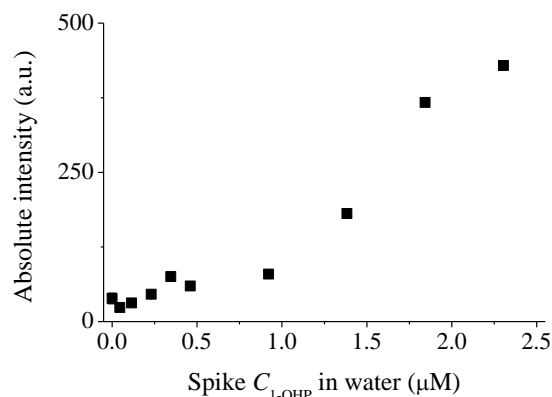

77

78 **Fig. S5** Signal intensity variation with 1-OHP concentration ( $C_{1-OHP}$ ) in ultrapure water;  
79 inset: linear relationship between signal intensity and  $C_{1-OHP}$  ranging from 0.92–2.29  $\mu\text{M}$ .  
80 The error bars are the SD of the mean value obtained from six independent measurements.

81

82 **6. Standard addition curves used for quantifying 1-OHP in urine and hydrolyzed**  
83 **urine samples.**

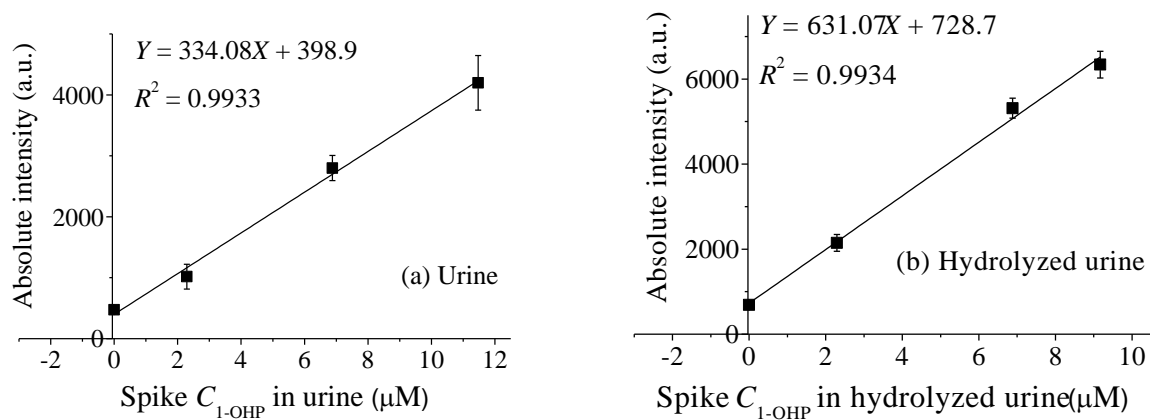

84

85 **Fig. S6** Standard addition curves used for quantifying 1-OHP in (a) urine and (b)  
86 hydrolyzed urine samples containing 2.29  $\mu\text{M}$  of 1-OHP.

87

88

89

90 **6. Preparation of spiked samples**

91 **Table S1** Preparation of spiked urine samples.

| Spiked (Spd)<br>Level | $C_{1\text{-OHP}}$<br>( $\mu\text{M}$ ) | Preparation                                                              |
|-----------------------|-----------------------------------------|--------------------------------------------------------------------------|
| Spd-1                 | 45.83                                   | 100 $\mu\text{L}$ of 1-OHP stock solution + 900 $\mu\text{L}$ of urine   |
| Spd-2                 | 36.66                                   | 80 $\mu\text{L}$ of 1-OHP stock solution + 920 $\mu\text{L}$ of urine    |
| Spd-3                 | 27.49                                   | 60 $\mu\text{L}$ of 1-OHP stock solution + 940 $\mu\text{L}$ of urine    |
| Spd-4                 | 22.91                                   | 50 $\mu\text{L}$ of 1-OHP stock solution + 950 $\mu\text{L}$ of urine    |
| Spd-5                 | 18.33                                   | 40 $\mu\text{L}$ of 1-OHP stock solution + 960 $\mu\text{L}$ of urine    |
| Spd-6                 | 9.17                                    | 20 $\mu\text{L}$ of 1-OHP stock solution + 980 $\mu\text{L}$ of urine    |
| Spd-7                 | 4.58                                    | 10 $\mu\text{L}$ of 1-OHP stock solution + 990 $\mu\text{L}$ of urine    |
| Std-8                 | 3.44                                    | 7.5 $\mu\text{L}$ of 1-OHP stock solution + 992.5 $\mu\text{L}$ of urine |
| Std-9                 | 2.29                                    | 5 $\mu\text{L}$ of 1-OHP stock solution + 995 $\mu\text{L}$ of urine     |

92

93

94

95

96

97

98

99

100

101

102

**Table S2** Preparation of spiked hydrolyzed urine samples.

| Spd Level | $C_{1\text{-OHP}}$ ( $\mu\text{M}$ ) | Preparation                                                                       |
|-----------|--------------------------------------|-----------------------------------------------------------------------------------|
| Spd-1     | 45.83                                | 100 $\mu\text{L}$ of 1-OHP stock solution + 900 $\mu\text{L}$ of hydrolyzed urine |
| Spd-2     | 34.40                                | 75 $\mu\text{L}$ of 1-OHP stock solution + 925 $\mu\text{L}$ of hydrolyzed urine  |
| Spd-3     | 22.91                                | 50 $\mu\text{L}$ of 1-OHP stock solution + 950 $\mu\text{L}$ of hydrolyzed urine  |
| Spd-4     | 11.47                                | 25 $\mu\text{L}$ of 1-OHP stock solution + 975 $\mu\text{L}$ of hydrolyzed urine  |
| Spd-5     | 4.58                                 | 100 $\mu\text{L}$ of Spd-1 + 900 $\mu\text{L}$ of hydrolyzed urine                |
| Std-6     | 3.44                                 | 100 $\mu\text{L}$ of Spd-2 + 900 $\mu\text{L}$ of hydrolyzed urine                |
| Std-7     | 2.29                                 | 100 $\mu\text{L}$ of Spd-3 + 900 $\mu\text{L}$ of hydrolyzed urine                |
| Std-8     | 1.15                                 | 100 $\mu\text{L}$ of Spd-4 + 900 $\mu\text{L}$ of hydrolyzed urine                |
| Std-9     | 0.46                                 | 100 $\mu\text{L}$ of Spd-5 + 900 $\mu\text{L}$ of hydrolyzed urine                |
| Std-10    | 0.23                                 | 100 $\mu\text{L}$ of Spd-7 + 900 $\mu\text{L}$ of hydrolyzed urine                |
| Std-11    | 0.05                                 | 100 $\mu\text{L}$ of Spd-9 + 900 $\mu\text{L}$ of hydrolyzed urine                |

103

104

105

106

107

108

109

110

111

112

113

**Table S3** Preparation of spiked ultrapure water samples.

| Spd Level | $C_{1\text{-OHP}}$ ( $\mu\text{M}$ ) | Preparation                                                                    |
|-----------|--------------------------------------|--------------------------------------------------------------------------------|
| Spd-1     | 2.29                                 | 5 $\mu\text{L}$ of 1-OHP stock solution + 995 $\mu\text{L}$ of ultrapure water |
| Spd-2     | 1.83                                 | 800 $\mu\text{L}$ of Spd-1 + 200 $\mu\text{L}$ of ultrapure water              |
| Spd-3     | 1.38                                 | 600 $\mu\text{L}$ of Spd-1 + 400 $\mu\text{L}$ of ultrapure water              |
| Spd-4     | 0.92                                 | 400 $\mu\text{L}$ of Spd-1 + 600 $\mu\text{L}$ of ultrapure water              |
| Spd-5     | 0.46                                 | 200 $\mu\text{L}$ of Spd-1 + 800 $\mu\text{L}$ of ultrapure water              |
| Std-6     | 0.34                                 | 150 $\mu\text{L}$ of Spd-1 + 850 $\mu\text{L}$ of ultrapure water              |
| Std-7     | 0.23                                 | 100 $\mu\text{L}$ of Spd-1 + 900 $\mu\text{L}$ of ultrapure water              |
| Std-8     | 0.11                                 | 50 $\mu\text{L}$ of Spd-1 + 950 $\mu\text{L}$ of ultrapure water               |
| Std-9     | 0.05                                 | 100 $\mu\text{L}$ of Spd-5 + 900 $\mu\text{L}$ of ultrapure water              |

114

115

116

117

118

119

120

121

122

123

124

125

126 **Table S4** Preparation of spiked solutions<sup>a</sup> used for matrix effect studies.

| Spd Level | $C_{1\text{-OHP}}$ ( $\mu\text{M}$ ) | Preparation                                                                   |
|-----------|--------------------------------------|-------------------------------------------------------------------------------|
| Spd-1     | 11.45                                | 25 $\mu\text{L}$ of 1-OHP stock solution + 975 $\mu\text{L}$ of each solution |
| Spd-2     | 2.29                                 | 200 $\mu\text{L}$ of Spd-1 + 800 $\mu\text{L}$ of each solution               |

127 <sup>a</sup> Solutions used for studying matrix effect include 100% hydrolyzed urine, hydrolyzed  
128 urine: water (75:25, V/V), hydrolyzed urine: water (50:50, V/V) and 100% water.

129

130

131

132

133

134

135

136

137

138

139

140

141

142

143

144

145

146 **7. RSDs ( $n = 6$ ) of working curves for urine, hydrolyzed urine and ultrapure water**  
147 **samples.**

148 **Table S5** RSDs ( $n = 6$ ) of working curves for urine, hydrolyzed urine and ultrapure water  
149 samples.

| Urine                            |                | Hydrolyzed urine                 |            | Ultrapure water                  |            |
|----------------------------------|----------------|----------------------------------|------------|----------------------------------|------------|
| $C_{1-OHP}$<br>( $\mu\text{M}$ ) | RSD<br>(%)     | $C_{1-OHP}$<br>( $\mu\text{M}$ ) | RSD<br>(%) | $C_{1-OHP}$<br>( $\mu\text{M}$ ) | RSD<br>(%) |
| 0 (Blank)                        | / <sup>a</sup> | 0 (Blank)                        | 3.1        | 0 (Blank)                        | 22.9       |
| 2.29                             | 6.2            | 0.05                             | 11.5       | 0.05                             | 11.2       |
| 3.44                             | 4.0            | 0.23                             | 10.4       | 0.11                             | 12.9       |
| 4.58                             | 2.6            | 0.46                             | 4.2        | 0.23                             | 12.4       |
| 9.17                             | 9.7            | 1.15                             | 3.5        | 0.34                             | 9.5        |
| 18.33                            | 3.9            | 2.29                             | 1.7        | 0.46                             | 7.2        |
| 22.91                            | 3.0            | 3.44                             | 1.5        | 0.92                             | 6.0        |
| 27.49                            | 8.0            | 4.58                             | 2.3        | 1.38                             | 7.2        |
| 36.66                            | 7.0            | 11.47                            | 2.2        | 1.83                             | 7.7        |
| 45.83                            | 3.3            | 22.91                            | 6.4        | 2.29                             | 5.5        |

150 <sup>a</sup> RSD cannot be calculated, for signal intensities of six measurements were all zero.

151 **8. RSDs ( $n = 6$ ) of the standard addition curves for quantifying 1-OHP in urine and**  
152 **hydrolyzed urine samples.**

153 **Table S6** RSDs (%) ( $n = 6$ ) of standard addition curves for quantifying 1-OHP in urine  
154 and hydrolyzed urine samples (**Fig. S5**).

| Urine                                           |         | Hydrolyzed urine                                |         |
|-------------------------------------------------|---------|-------------------------------------------------|---------|
| $C_{1\text{-OHP}}^{\text{a}}$ ( $\mu\text{M}$ ) | RSD (%) | $C_{1\text{-OHP}}^{\text{b}}$ ( $\mu\text{M}$ ) | RSD (%) |
| 0                                               | 5.8     | 0                                               | 9.0     |
| 2.29                                            | 19.9    | 2.29                                            | 9.2     |
| 6.88                                            | 7.3     | 6.88                                            | 4.4     |
| 11.47                                           | 10.7    | 9.17                                            | 4.9     |

155 <sup>a</sup> Spike concentrations in urine; <sup>a</sup> spike concentrations in hydrolyzed urine.
